# Supplementary material for: Phostensin enables lymphocyte integrin activation and population of peripheral lymphoid organs
Source: PubMed Central journal article supplement — J Exp Med. 2022 Jun 29;219(8):e20211637. doi: 10.1084/jem.20211637 (PMC9247717; doi:10.1084/jem.20211637), 2022-06-29

SourceDataFS1A

|         |   |   |
|---------|---|---|
| Sh-CTRL | + | - |
| Sh-PTSN | - | + |

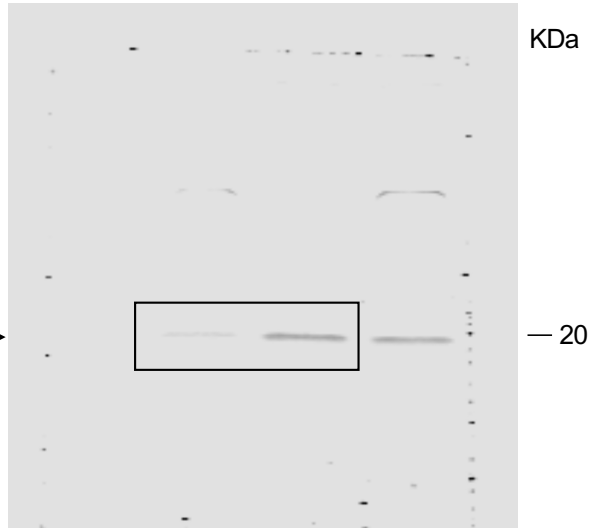

pCofilin (Ser3) →

KDa

— 20

Blot

Total Cofilin →

— 20

Blot

|         |   |   |
|---------|---|---|
| Sh-CTRL | + | - |
| Sh-PTSN | - | + |

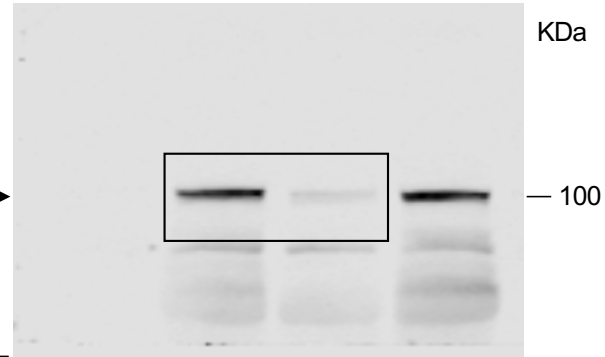

β-PTSN →

KDa

— 100

Blot

GAPDH →

— 37

Blot

SourceDataFS1B

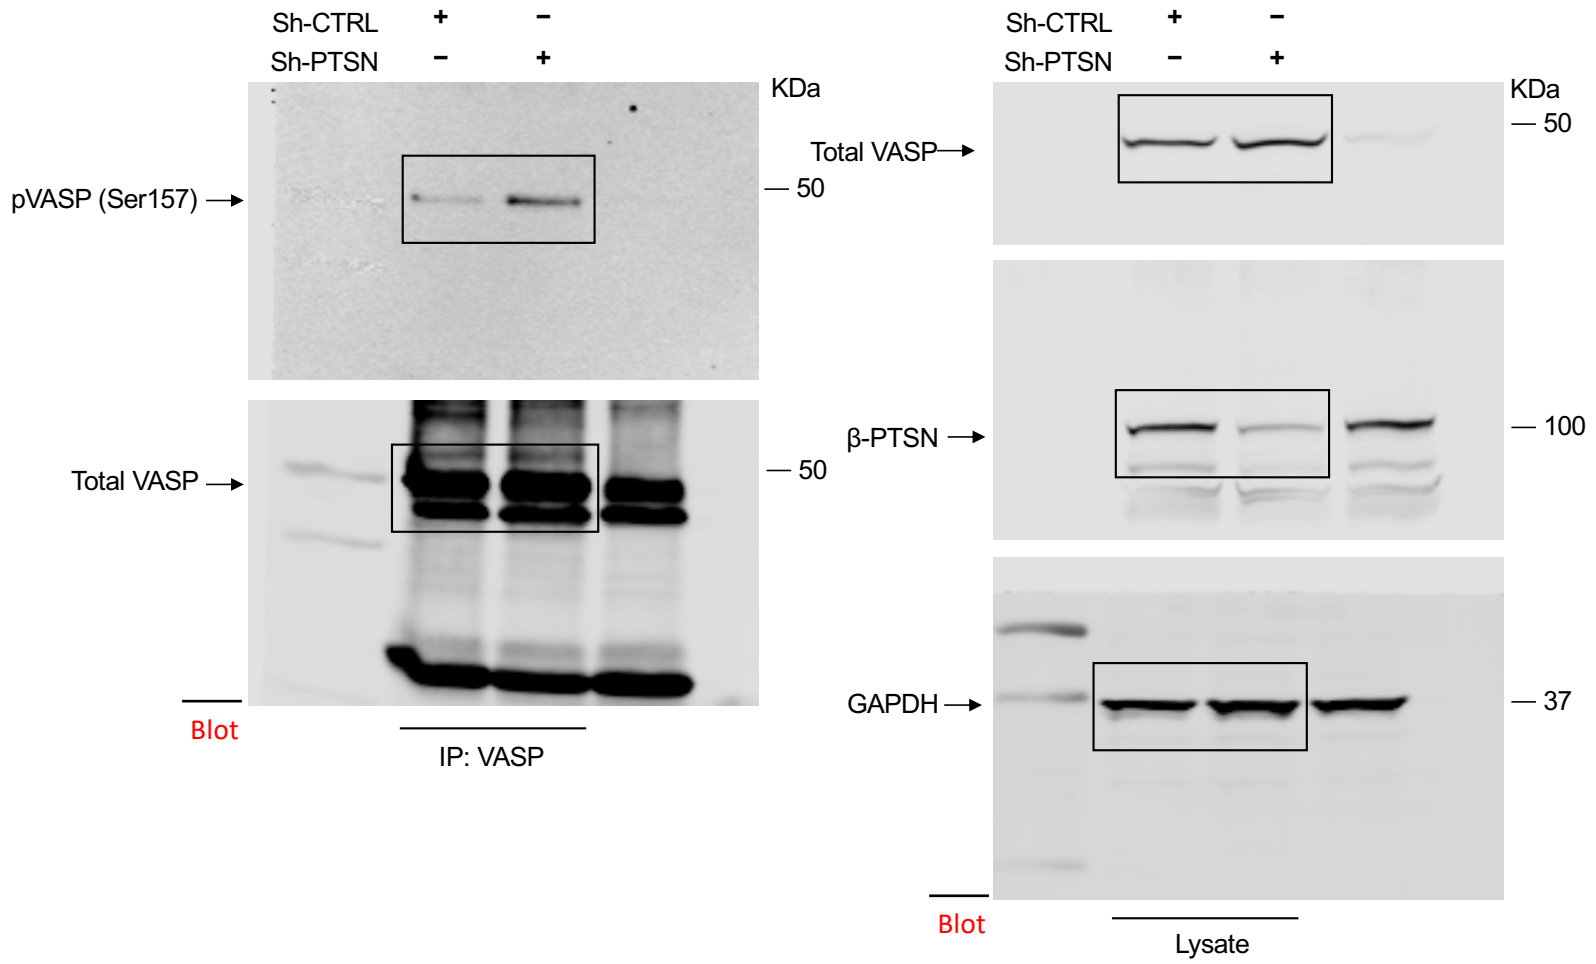

SourceDataFS1C

|                |   |   |   |   |
|----------------|---|---|---|---|
| Sh-CTRL        | + | + | - | - |
| Sh-PTSN        | - | + | + | + |
| $\beta$ -PTSN  | - | - | + | - |
| $\alpha$ -PTSN | - | - | - | + |

|                |   |   |   |   |
|----------------|---|---|---|---|
| Sh-CTRL        | + | + | - | - |
| Sh-PTSN        | - | + | + | + |
| $\beta$ -PTSN  | - | - | + | - |
| $\alpha$ -PTSN | - | - | - | + |

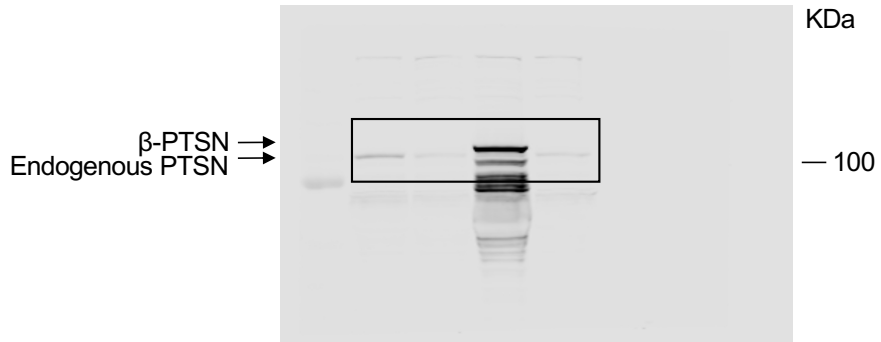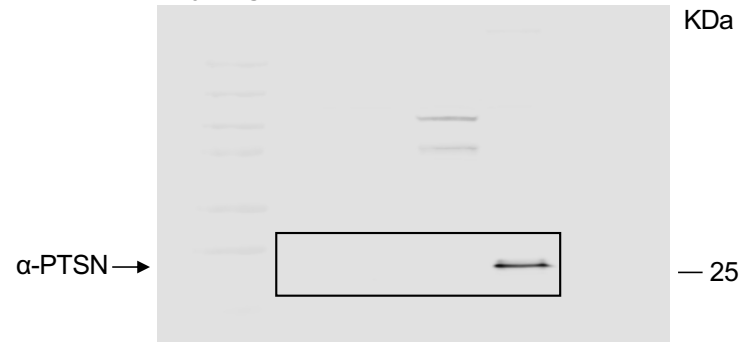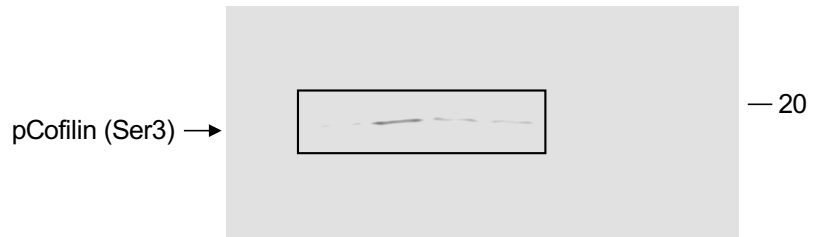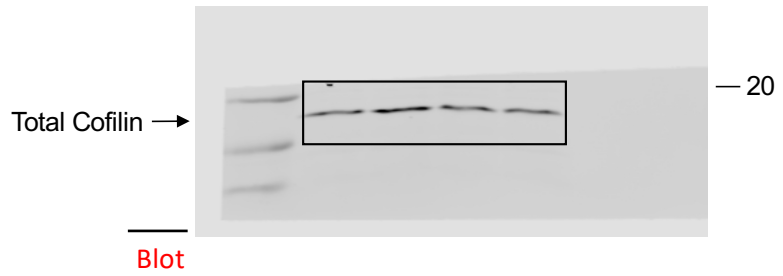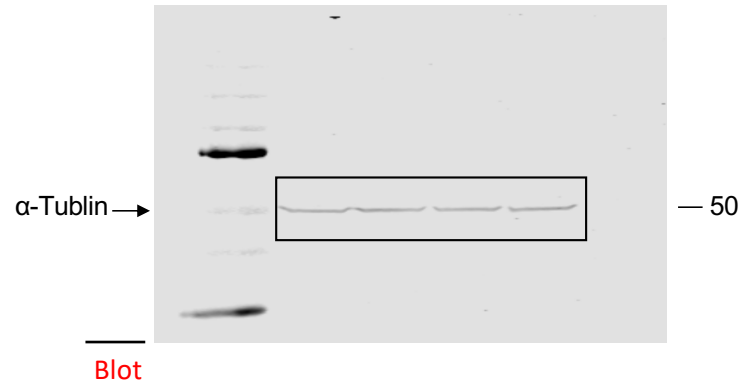

SourceDataFS1D

PPP1R18<sup>+/+</sup>  
PPP1R18<sup>-/-</sup>

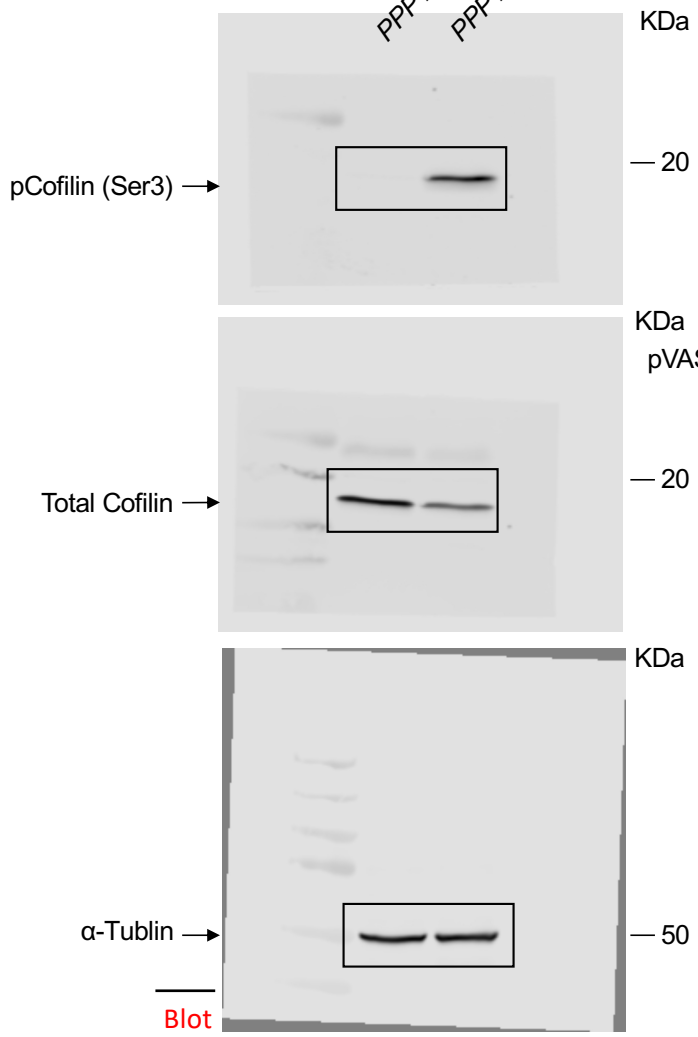

SourceDataFS1E

PPP1R18<sup>+/+</sup>  
PPP1R18<sup>-/-</sup>

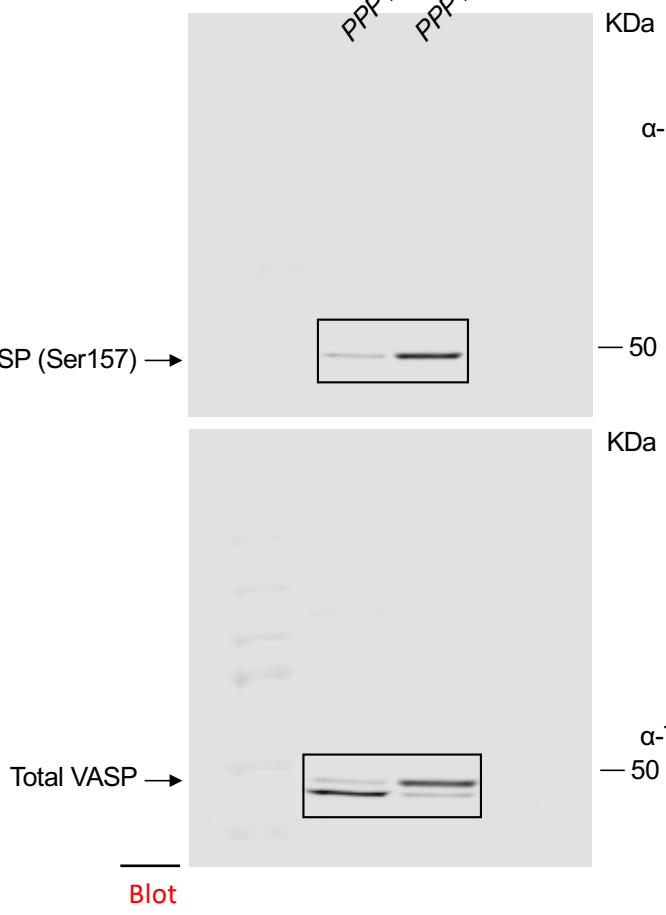

PPP1R18<sup>+/+</sup>  
PPP1R18<sup>-/-</sup>

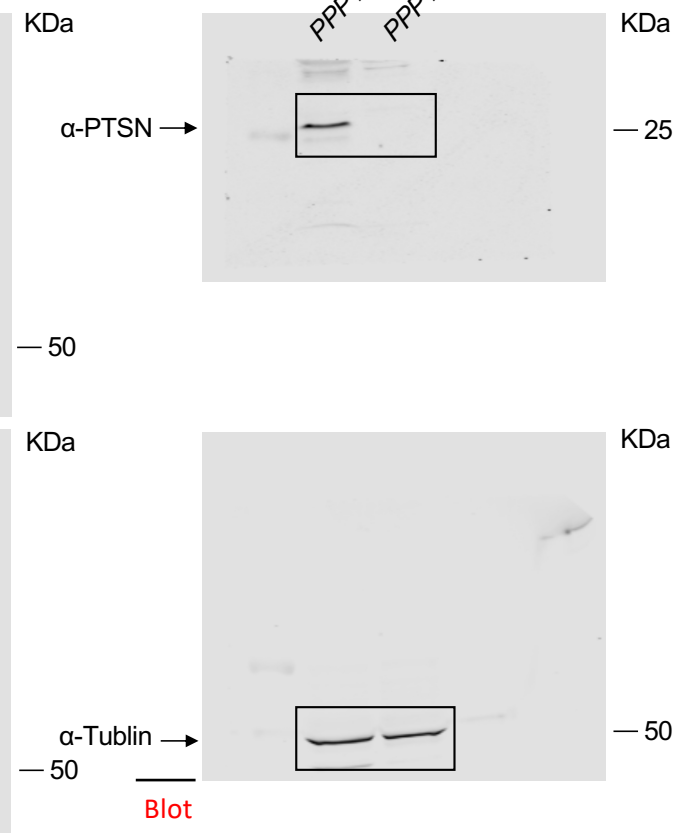

Supplement: JEM_20211637_SourceDataFS1.pdf [file JEM_20211637_SourceDataFS1.pdf]
