# Supplementary material for: Phostensin enables lymphocyte integrin activation and population of peripheral lymphoid organs
Source: PubMed Central journal article supplement — J Exp Med. 2022 Jun 29;219(8):e20211637. doi: 10.1084/jem.20211637 (PMC9247717; doi:10.1084/jem.20211637), 2022-06-29
Supplement: JEM_20211637_SourceDataF1.pdf [file JEM_20211637_SourceDataF1.pdf]

SourceDataF1B

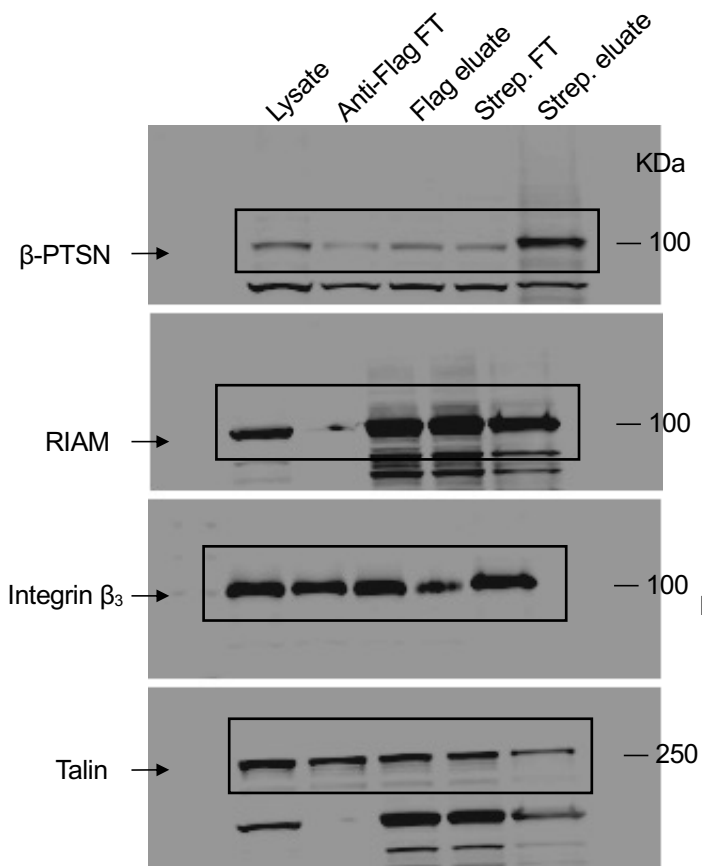

RIAM tandem affinity purification

Fig. 1C

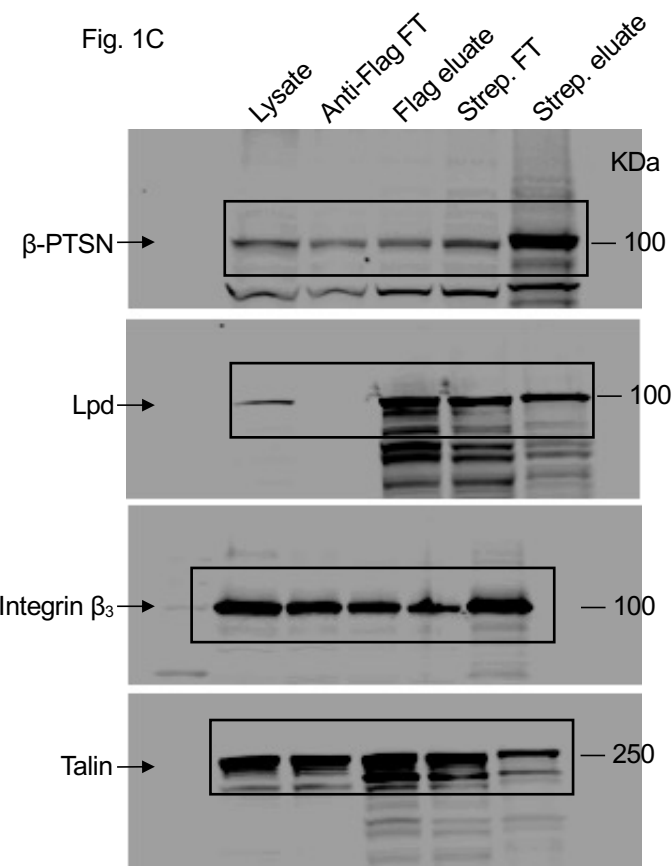

LPD tandem affinity purification

Fig. 1D

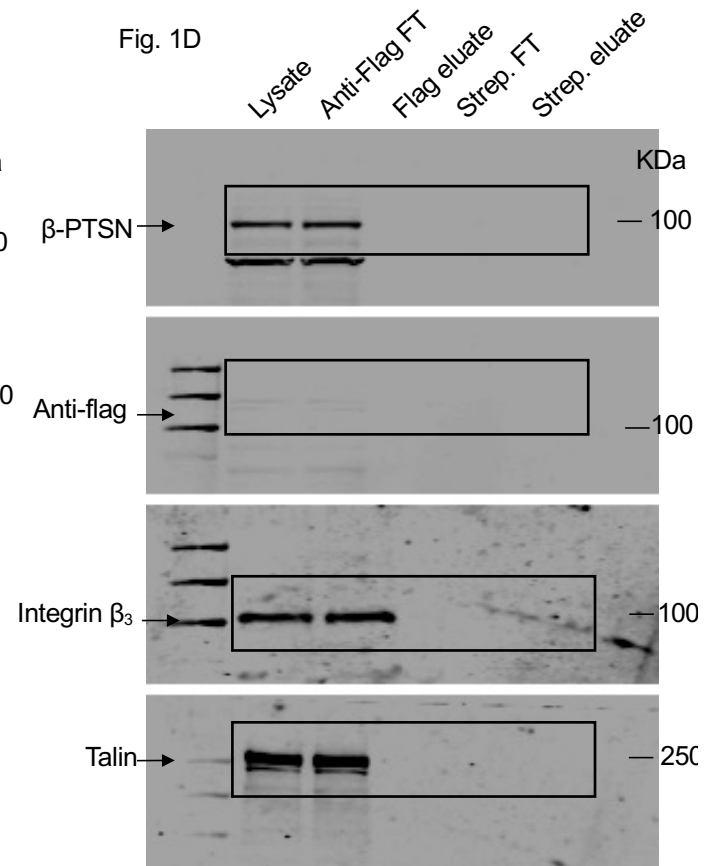

Control tandem affinity purification
