# Supplementary material for: Phostensin enables lymphocyte integrin activation and population of peripheral lymphoid organs
Source: PubMed Central journal article supplement — J Exp Med. 2022 Jun 29;219(8):e20211637. doi: 10.1084/jem.20211637 (PMC9247717; doi:10.1084/jem.20211637), 2022-06-29

|            |                   |   |   |   |   |
|------------|-------------------|---|---|---|---|
| SourceData | Sh-CTRL           | + | - | - | + |
| F5B        | Sh-PTS            | - | + | + | - |
|            | mCh- $\beta$ -PTS | - | - | + | - |
|            | Flag-RIAM         | + | + | + | + |

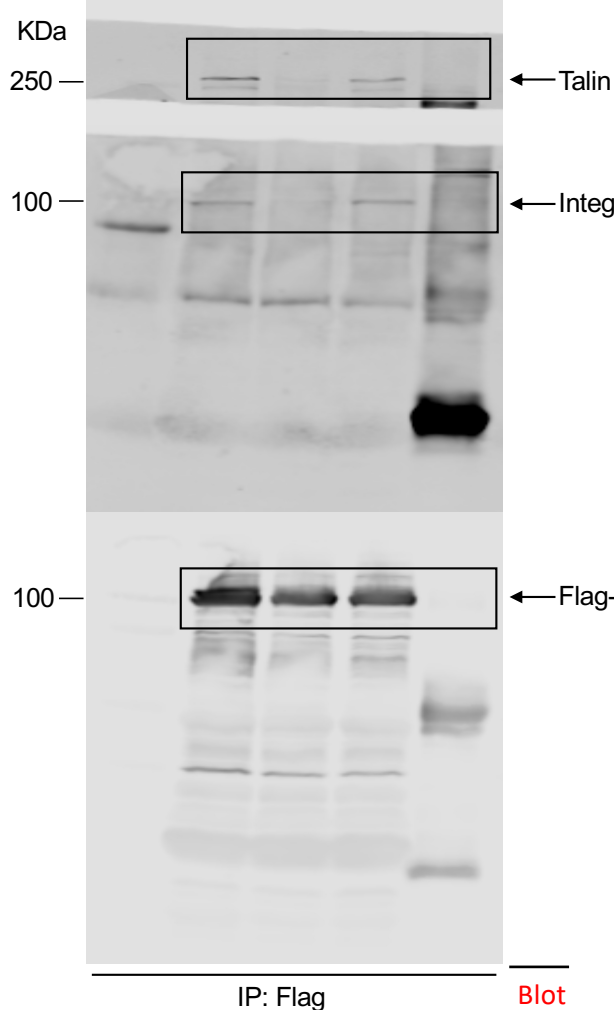

|  |                   |   |   |   |   |
|--|-------------------|---|---|---|---|
|  | Sh-CTRL           | + | - | - | + |
|  | Sh-PTS            | - | + | + | - |
|  | mCh- $\beta$ -PTS | - | - | + | - |
|  | Flag-RIAM         | + | + | + | + |

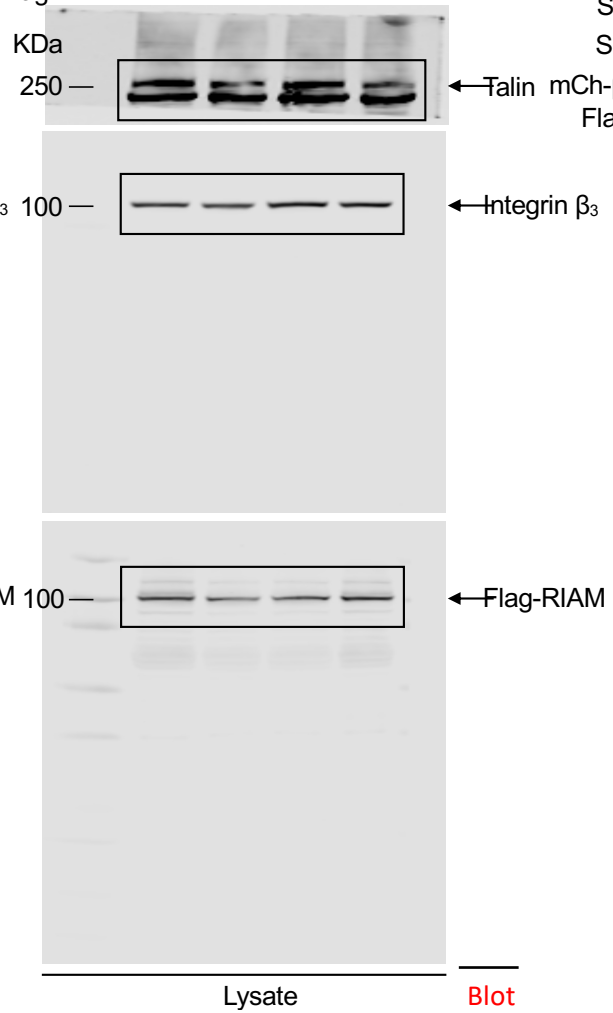

|  |                   |   |   |   |   |
|--|-------------------|---|---|---|---|
|  | Sh-CTRL           | + | - | - | + |
|  | Sh-PTS            | - | + | + | - |
|  | mCh- $\beta$ -PTS | - | - | + | - |
|  | Flag-RIAM         | + | + | + | + |

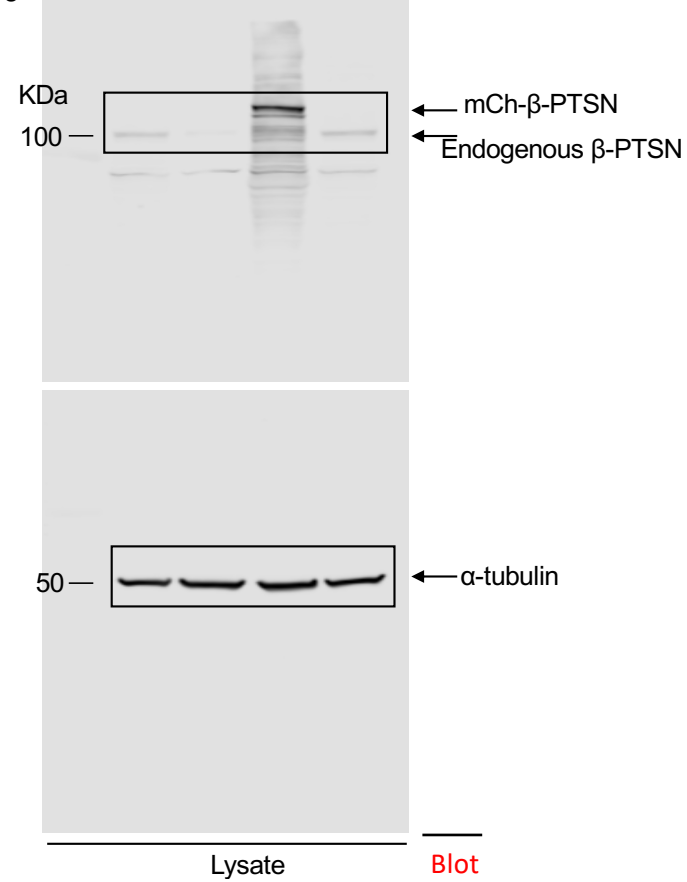

Supplement: JEM_20211637_SourceDataF5.pdf [file JEM_20211637_SourceDataF5.pdf]
