# Supplementary figures and images for: Phostensin enables lymphocyte integrin activation and population of peripheral lymphoid organs
Source: PubMed Central journal article supplement — J Exp Med. 2022 Jun 29;219(8):e20211637. doi: 10.1084/jem.20211637 (PMC9247717; doi:10.1084/jem.20211637), 2022-06-29

SourceDataF2B

|                |   |   |   |   |
|----------------|---|---|---|---|
| GFP-RIAM       | + | + | - | + |
| GFP            | - | - | + | - |
| $\beta$ -PTSN  | + | - | + | + |
| $\alpha$ -PTSN | - | + | - | - |

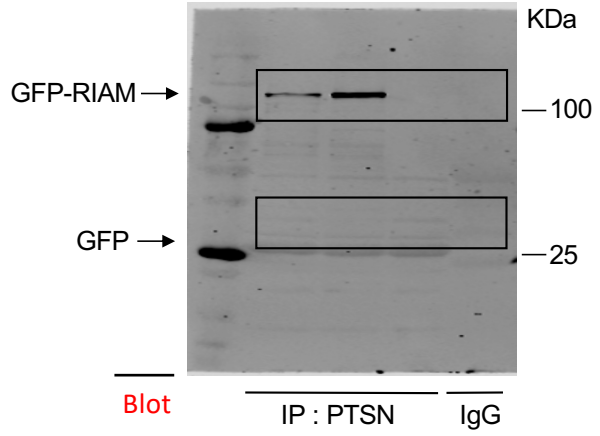

|                |   |   |   |   |
|----------------|---|---|---|---|
| GFP-RIAM       | + | + | - | + |
| GFP            | - | - | + | - |
| $\beta$ -PTSN  | + | - | + | + |
| $\alpha$ -PTSN | - | + | - | - |

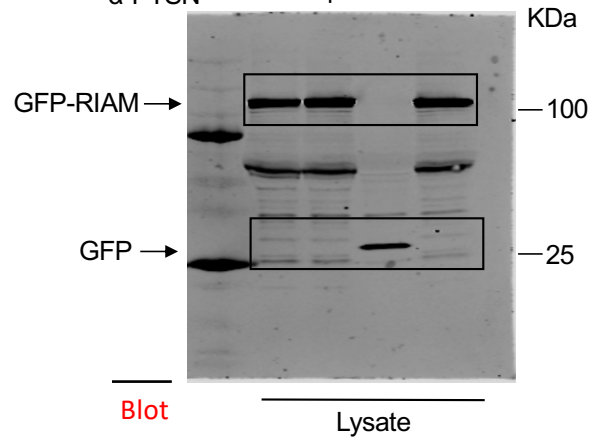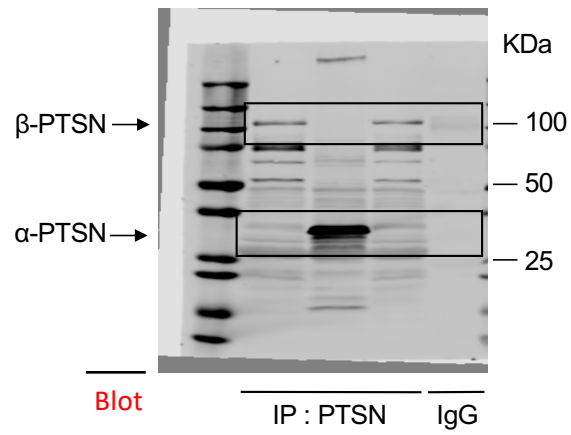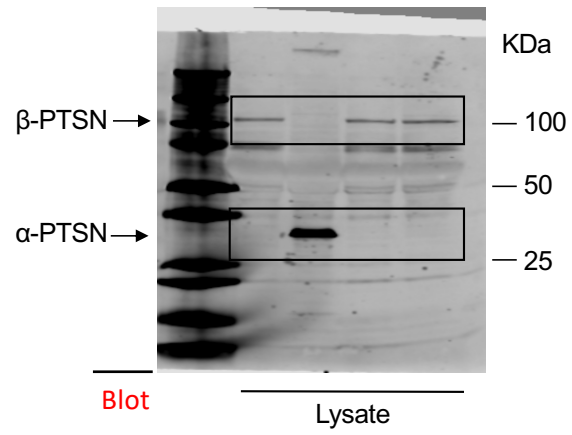

SourceDataF2E

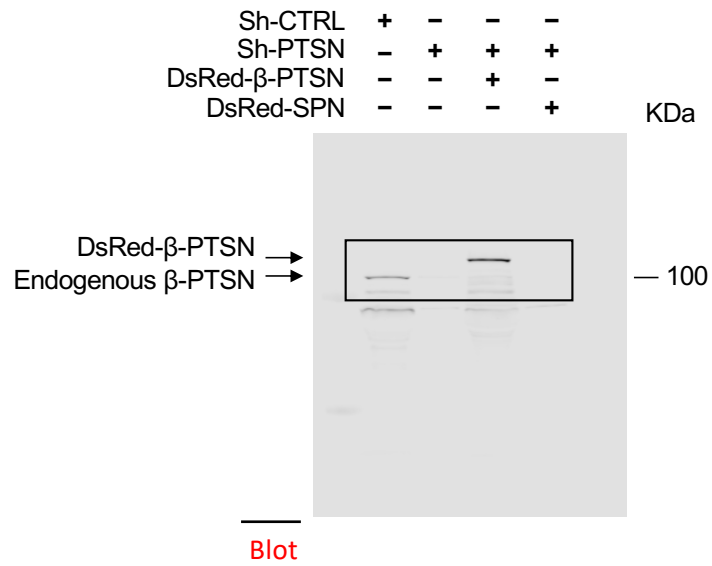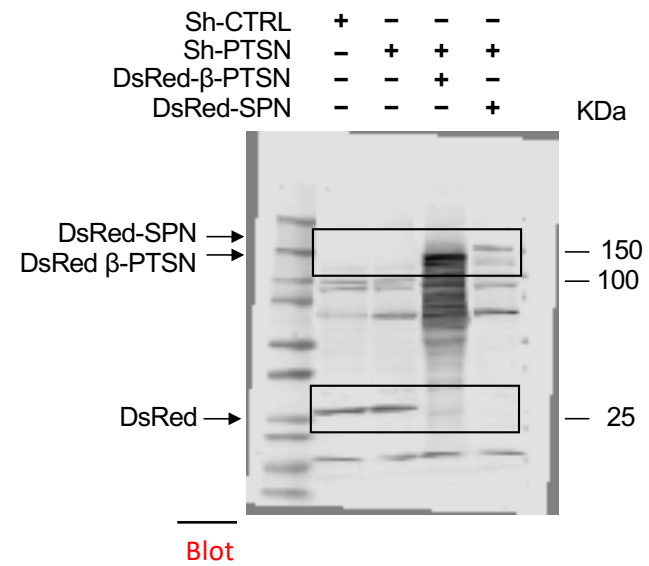

Supplement: JEM_20211637_SourceDataF2.pdf [file JEM_20211637_SourceDataF2.pdf]

SourceDataF3C

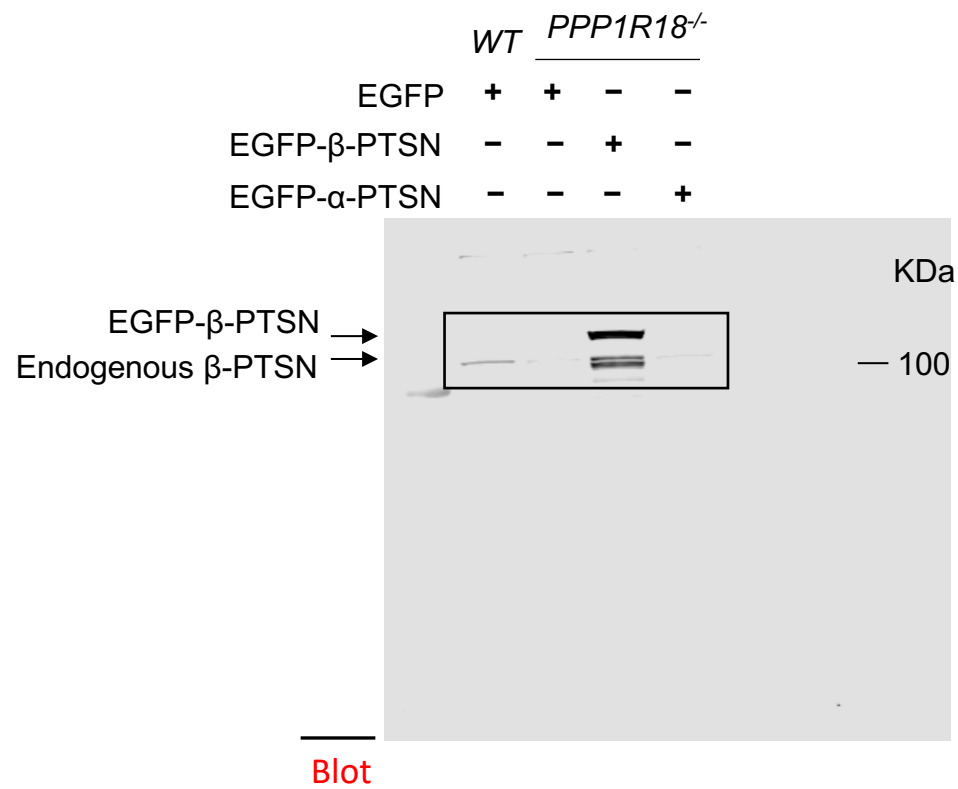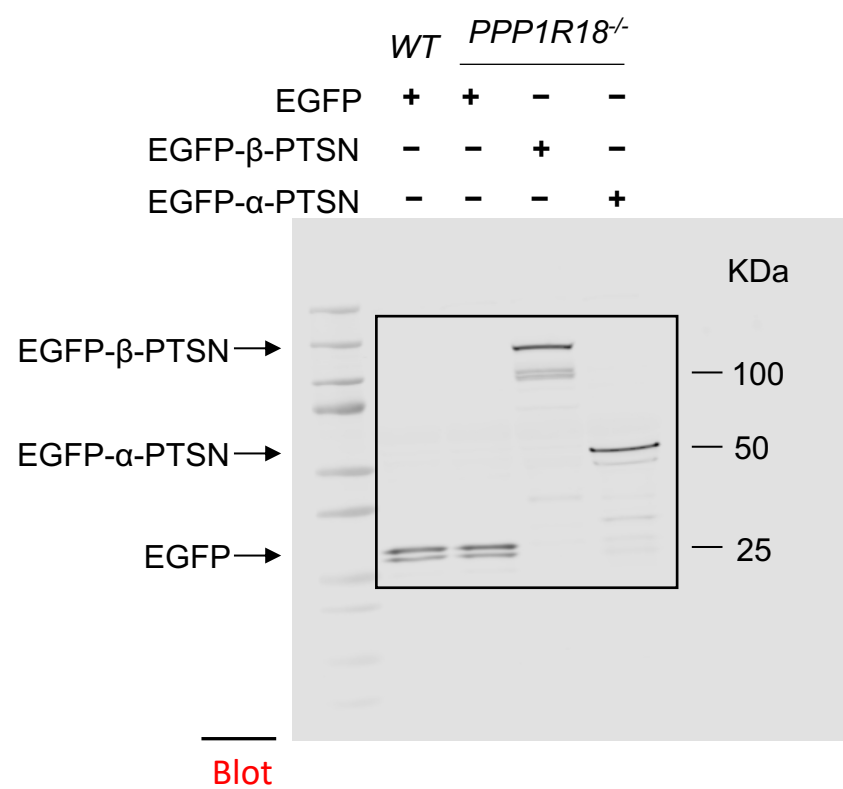

Supplement: JEM_20211637_SourceDataF3.pdf [file JEM_20211637_SourceDataF3.pdf]

SourceDataF6A

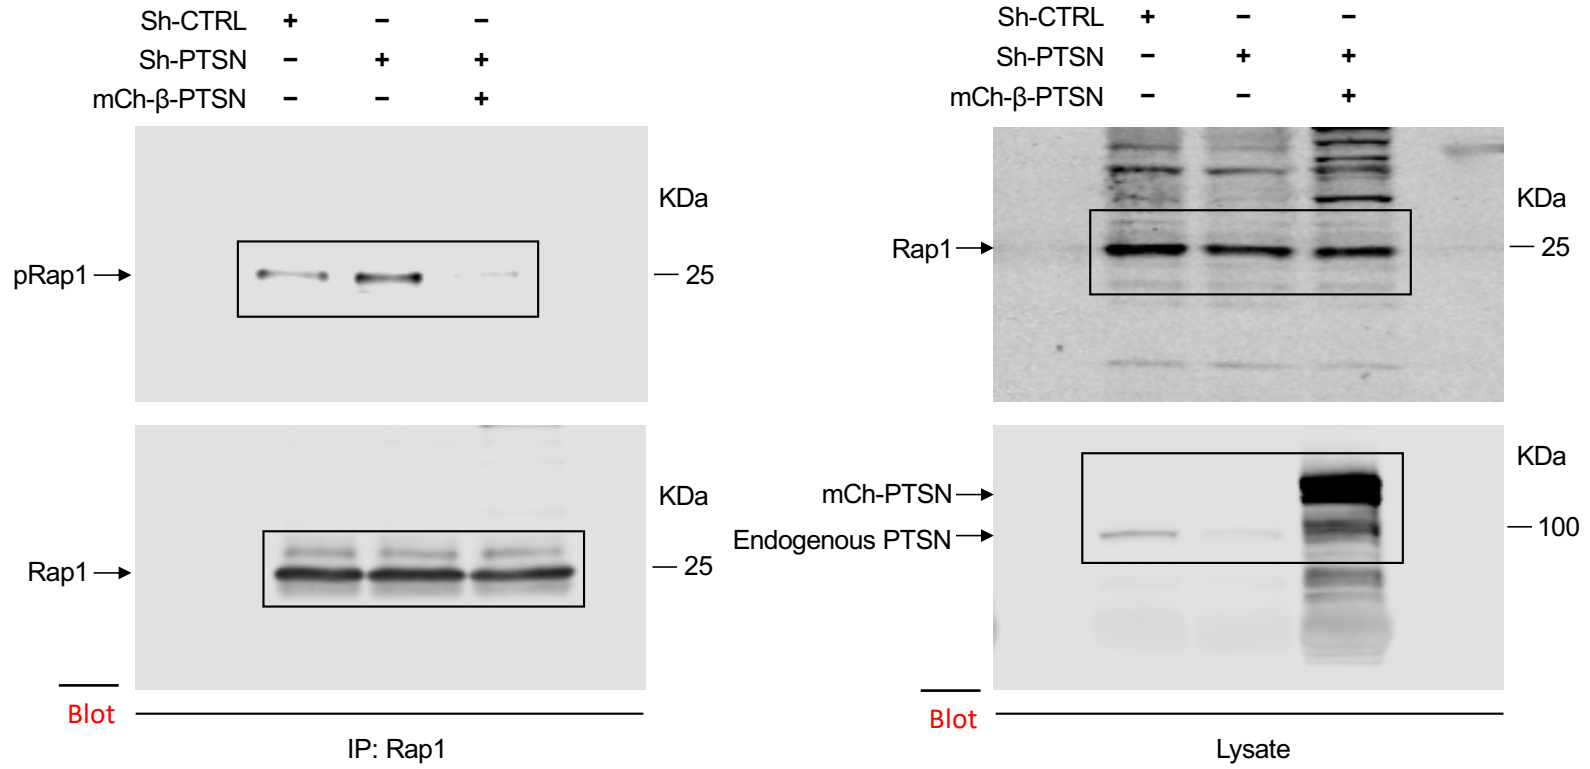

SourceDataF6B

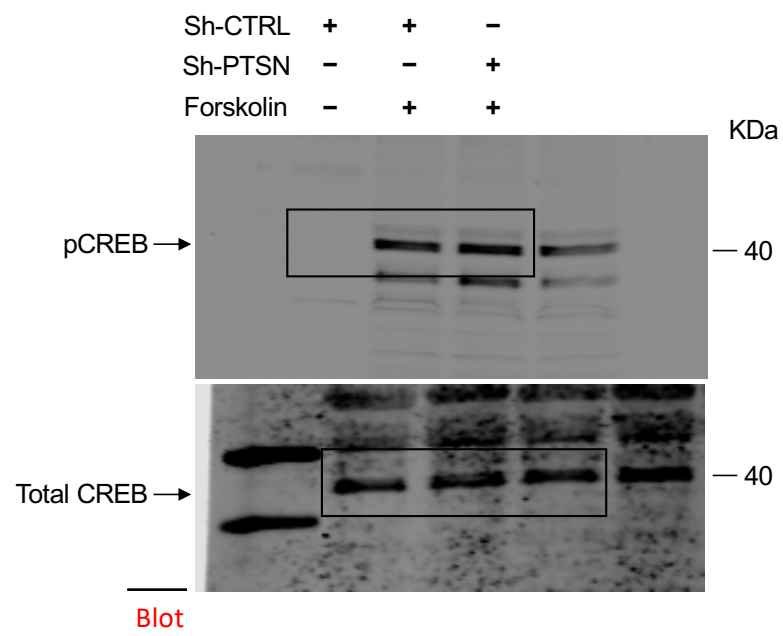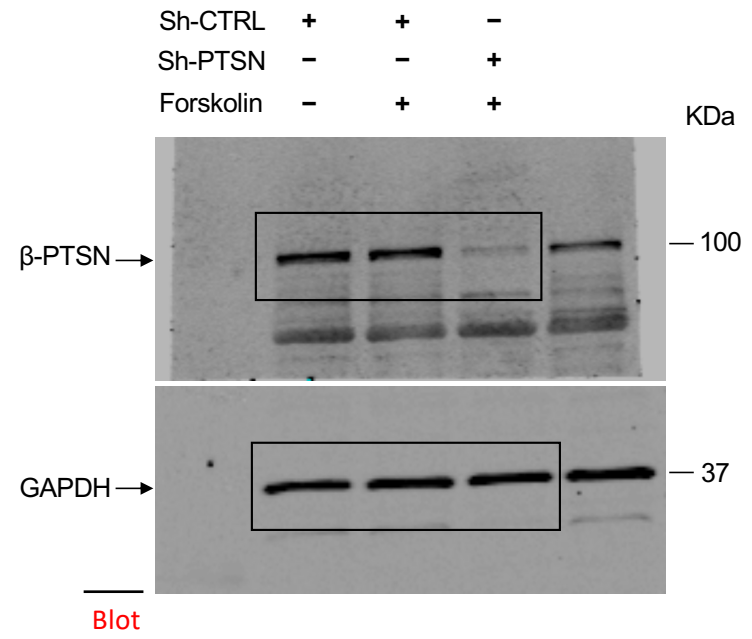

SourceDataF6C

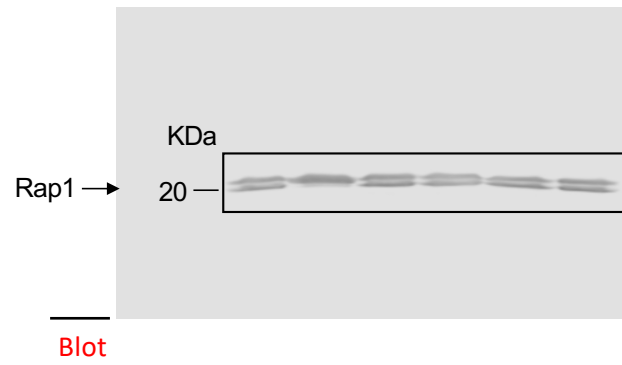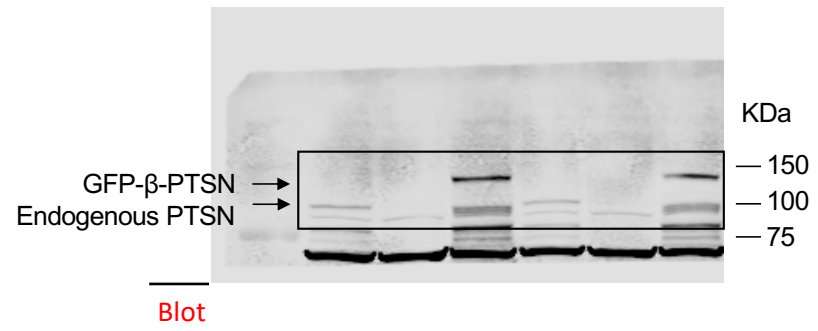

SourceDataF6D

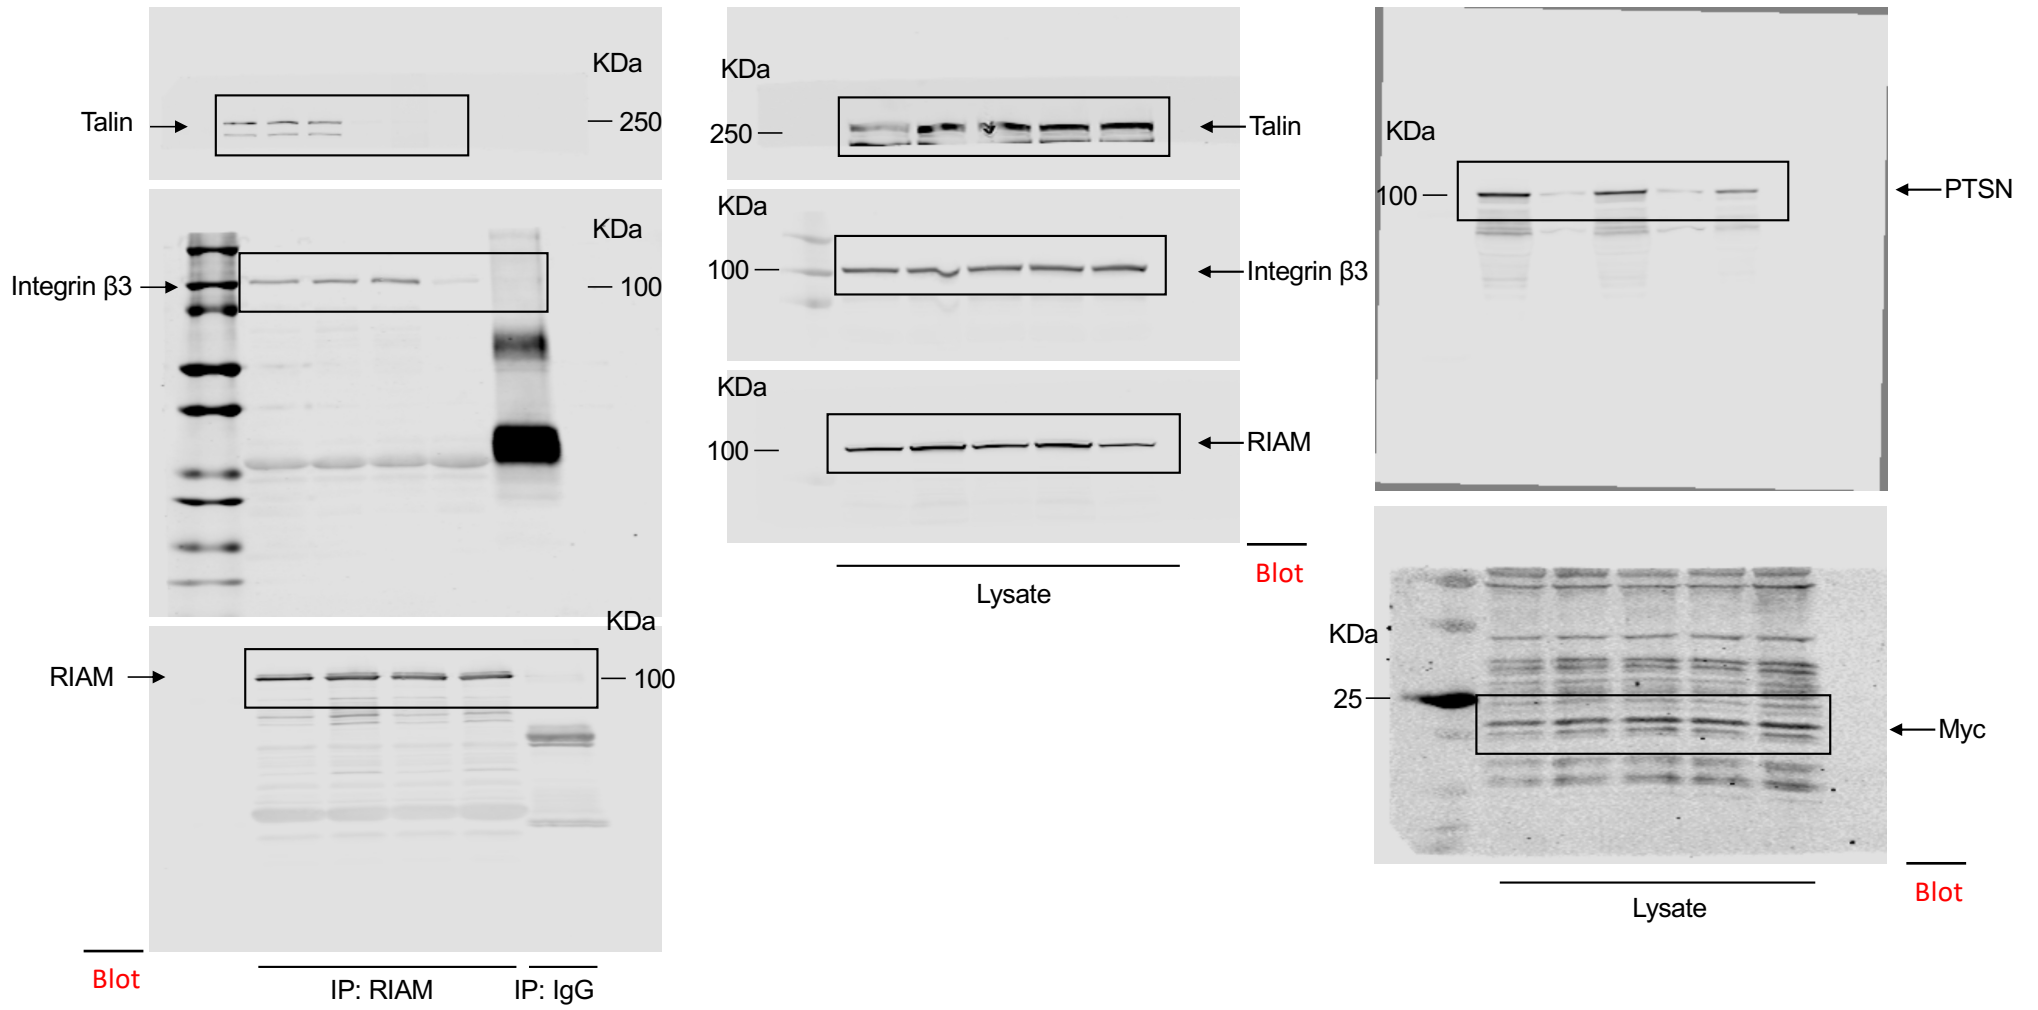

Supplement: JEM_20211637_SourceDataF6.pdf [file JEM_20211637_SourceDataF6.pdf]

SourceDataF7B

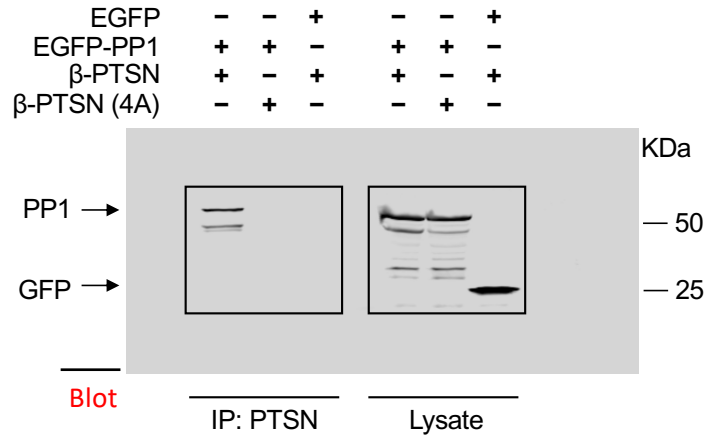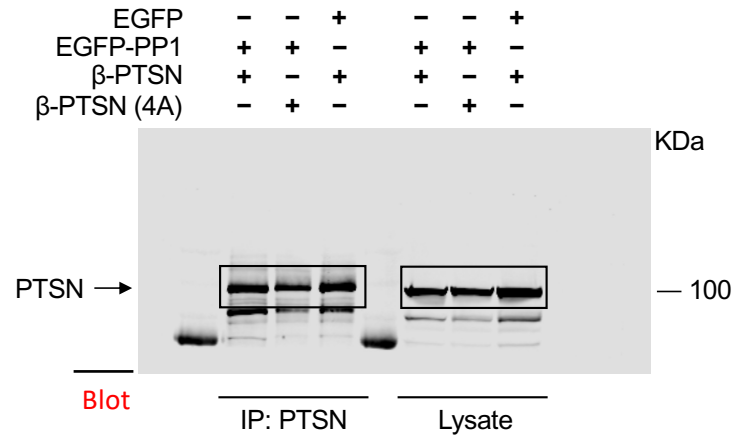

SourceData7D

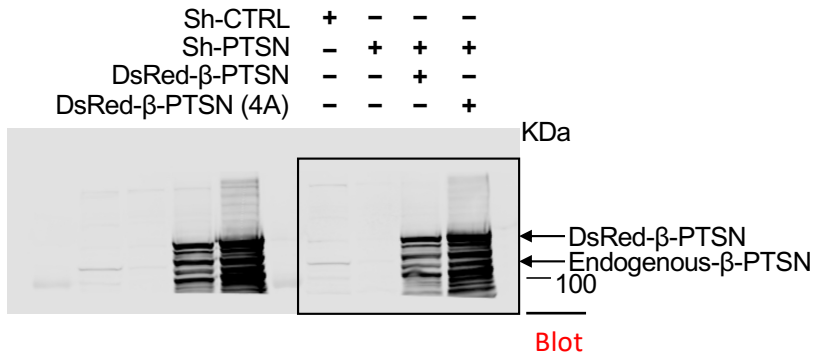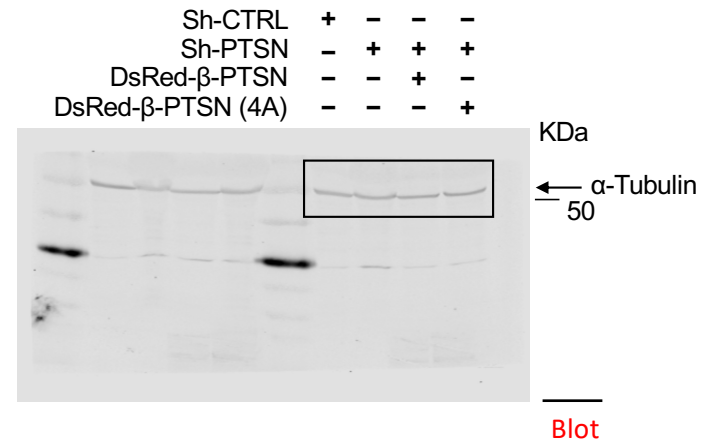

Supplement: JEM_20211637_SourceDataF7.pdf [file JEM_20211637_SourceDataF7.pdf]

SourceDataFS2A

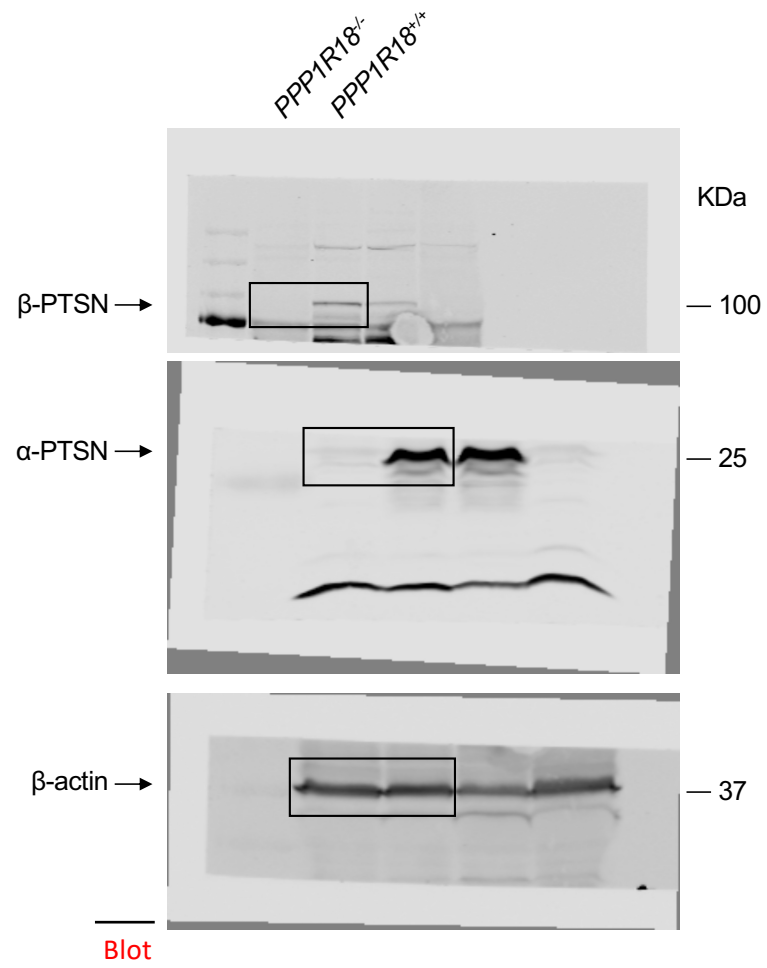

Supplement: JEM_20211637_SourceDataFS2.pdf [file JEM_20211637_SourceDataFS2.pdf]

SourceDataFS3B

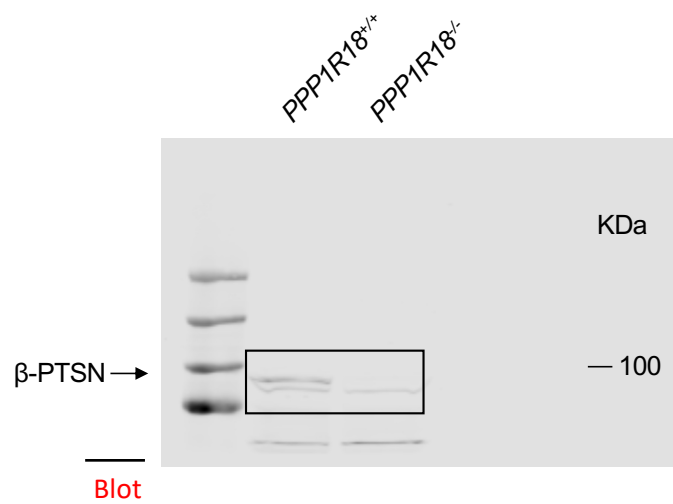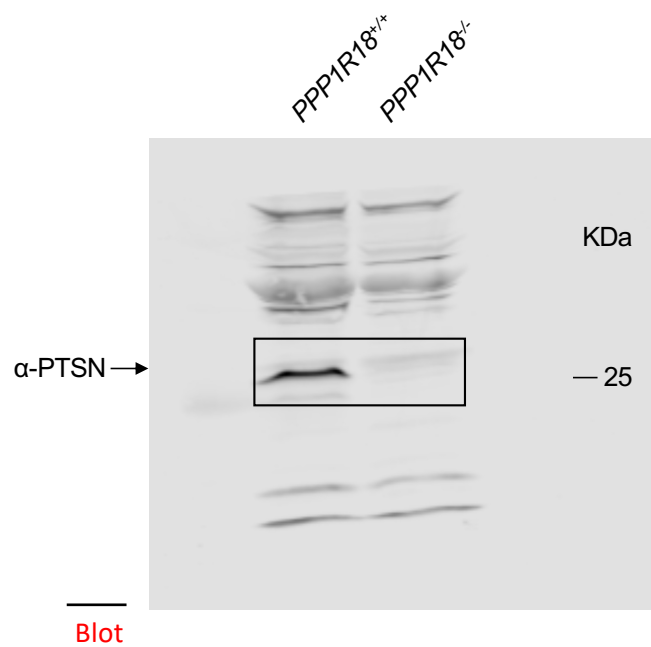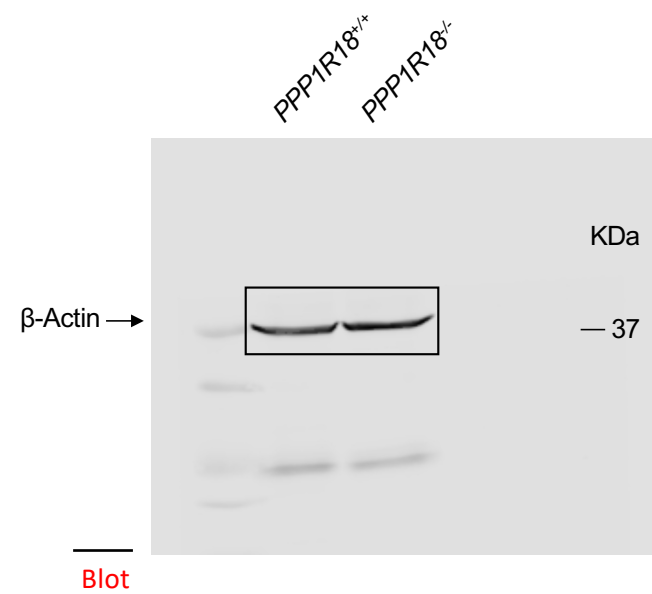

Supplement: JEM_20211637_SourceDataFS3.pdf [file JEM_20211637_SourceDataFS3.pdf]

SourceDataFS4B

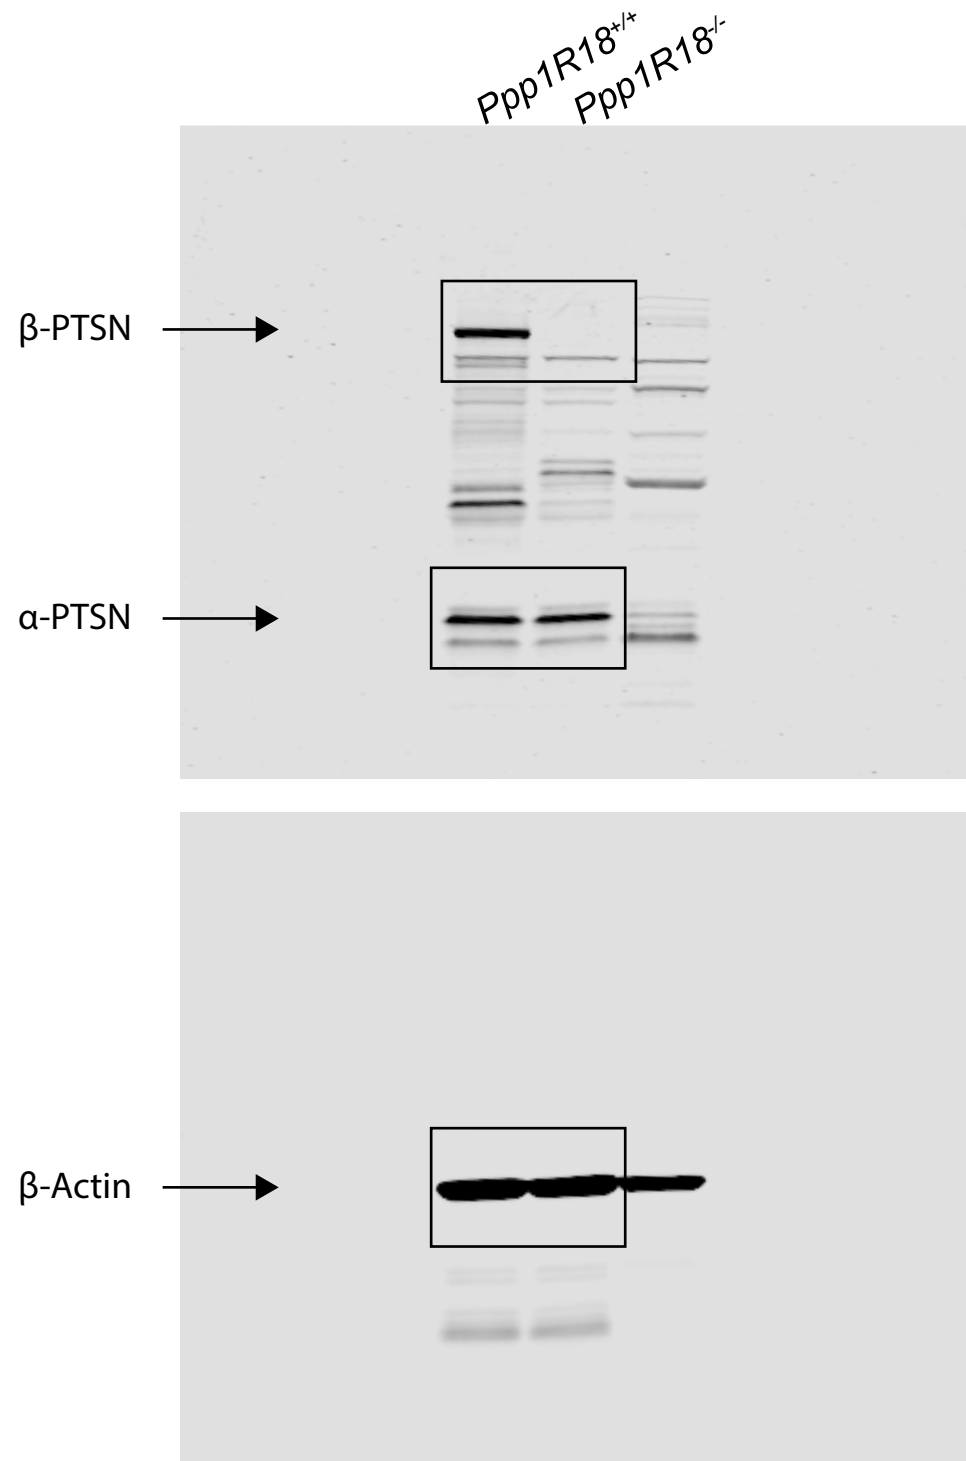

Supplement: JEM_20211637_SourceDataFS4.pdf [file JEM_20211637_SourceDataFS4.pdf]
